# Supplementary material for: Final Report of Unmet Needs of Interferon-Based Therapy for Chronic Hepatitis C in Korea: Basis for Moving into the Direct-Acting Antiviral Era
Source: PubMed Central journal article supplement — Gut Liver. 2017 May 17;11(4):543–50. doi: 10.5009/gnl16530 (PMC5491090; doi:10.5009/gnl16530), 2017-05-17
Supplement: gnl-11-551_suppl.pdf [file gnl-11-551_suppl.pdf]

**Supplementary Table 1.** Response Rates to Interferon-Based Antiviral Therapy among Korean Patients with Chronic Hepatitis C Virus Infection

|               | GT 1        |            | GT 2        |            | GT 3      |           | GT 4      |           | GT 6      |           |
|---------------|-------------|------------|-------------|------------|-----------|-----------|-----------|-----------|-----------|-----------|
|               | ITT (n=251) | PP (n=189) | ITT (n=273) | PP (n=238) | ITT (n=6) | PP (n=5)  | ITT (n=2) | PP (n=2)  | ITT (n=3) | PP (n=2)  |
| RVR           | 94 (37.5)   | 78 (41.3)  | 143 (52.4)  | 133 (55.9) | 2 (33.3)  | 2 (40.0)  | 1 (50.0)  | 1 (50.0)  | 0         | 0         |
| EVR           | 192 (76.5)  | 160 (84.7) | 126 (46.2)  | 113 (47.5) | 1 (16.7)  | 1 (20.0)  | 1 (50.0)  | 1 (50.0)  | 3 (100.0) | 2 (100.0) |
| pEVR          | 36 (14.3)   | 24 (12.7)  | 13 (4.8)    | 10 (4.2)   | 0         | 0         | 0         | 0         | 0         | 0         |
| cEVR          | 156 (62.2)  | 136 (72.0) | 113 (41.4)  | 103 (43.3) | 1 (16.7)  | 1 (20.0)  | 1 (50.0)  | 1 (50.0)  | 3 (100.0) | 2 (100.0) |
| ETR           | 185 (73.7)  | 171 (90.5) | 223 (81.7)  | 211 (88.7) | 5 (83.3)  | 5 (100.0) | 2 (100.0) | 2 (100.0) | 2 (66.7)  | 2 (100.0) |
| SVR           | 147 (58.6)  | 135 (71.4) | 203 (74.4)  | 193 (81.1) | 5 (83.3)  | 5 (100.0) | 1 (50.0)  | 1 (50.0)  | 2 (66.7)  | 2 (100.0) |
| Breakthrough  | 9 (3.6)     | 5 (2.6)    | 4 (1.5)     | 4 (1.7)    | 0         | 0         | 0         | 0         | 0         | 0         |
| Relapse       | 41 (16.3)   | 13 (16.4)  | 25 (9.2)    | 19 (8.0)   | 0         | 0         | 0         | 0         | 1 (33.3)  | 0         |
| Null response | 29 (11.6)   | 19 (10.1)  | 15 (5.5)    | 13 (5.5)   | 0         | 0         | 0         | 0         | 0         | 0         |
| Withdrawal    | 62 (24.7)   | -          | 35 (12.8)   | -          | 1 (16.7)  | -         | 0         | -         | 1 (33.3)  | -         |

Data are presented as number (%).

GT, genotype; ITT, intention-to-treat; PP, per protocol; RVR, rapid virologic response; EVR, early virologic response; pEVR, partial EVR; cEVR, complete EVR; ETR, end of treatment response; SVR, sustained virologic response.
